# Supplementary material for: Evaluation of the analytical performance of anti-SARS-CoV-2 antibody test kits distributed or developed in Japan
Source: Bioanalysis. 2022 Mar 2:10.4155/bio-2021-0254. doi: 10.4155/bio-2021-0254 (PMC8890363; doi:10.4155/bio-2021-0254)
Supplement: Supplementary file 1 [file Supplementary_data.xlsx]

## Sheet: Figure 1 Raw Data
Signature Peptide	Peak Area (MCX Elution)			Peak Area (HLB Elution)			Peak Area (PRiME HLB Elution)				Peak Area (MAX Elution)
	Rep 1	Rep 2	Rep 3	Rep 1	Rep 2	Rep 3	Rep 1	Rep 2	Rep 3	Rep 4	Rep 1	Rep 2	Rep 3
CD28-1	17909.7	8121.7	11245.5	6274.44	4654.88	5546.79		7439.33	8563.6	5379.55	2939.87	2025.37	2719.87
CD28-2	19807.4	14607.5	22250	36079.3	16569.6	16214.5		10778.8	12401.2	9364.2	7309.12	6158.24	7061.26
PD-L1	12725.3	16407.7	15954.3	5142.58	5099.97	3972.6	1386.56	1451.82	906.109	821.39	1227.1	814.883	1768.14
TLR4-1	24440.7	30726.6	32545.1	39151.8	28946.2	25172.2	35877.8	29002.1	22383.2	18191.5	5809.53	6117.02	6382.14
TLR4-2	24456.5	29682.1	31716.3	11193.5	15381.4	14133.1	15177.3	14508.1	11669.4	11828	2229.65	1908.66	2182.33
TIM3-1	4880.86	6829.88	6514.37	281.369	244.602	294.311	79.619	222.153	69.974	41.177	451.686	346.307	595.001
TIM3-2	16081.1	19214	18633.3	20814.8	17026.9	16730	15262.4	16080	8899.88	10346.5	3584.37	2178.78	3422.04
KLK6	54415	62189.5	47368.3	60062.2	60876.4	56573.1	49474	69376.6	37486.3	45799.1	7722.35	4963.53	8242.75
POSTN-1	15509.7	15952.6	17139.8	17239.7	12718.7	14590.9	17294.4	17417.6	11175.3	10540.6	6292.01	5494.6	4715.01
POSTN-2	22957.5	32118.2	23093.4	33479.6	27175.4	31735.3	6530.56	5163.52	2709.44	4374.53	4682.37	1001.2	1815.98
BCMA-1	55309	45642.9	34131.3	13668.1	12891.4	10220.7	2754.83	3202.22	1190.77	1608.22	4814.19	4618.45	6860.1
BCMA-2	80789.6	73433.3	79954.8	19540.7	19410.8	17516.3	4926.02	5808.24	1976.83	2457.61	3529.76	2262.29	4677.11

## Sheet: Figure 2 Raw Data
Figure 2c
Signature Peptide	Peak Area of Spike before MCX			Peak Area of Spike after MCX
	Rep 1	Rep 2	Rep 3	Rep 1	Rep 2	Rep 3
CD28-1	8829.42	15259	20017.5	26185.2	11599.9	16978.3
CD28-2	7323.35	12452.5	13666.7	21900.7	7404.9	13259.8
PD-L1	20080.2	19734.2	19538	23089.6	22097.5	18931.8
TLR4-1	28632.2	24958.8	33192.5	37092.3	29956.3	26566.7
TLR4-2	43137.5	43215.2	56789.8	62959.6	48209.9	41459.3
TIM3-1	12399.1	12640.7	12638.2	15783.2	12684.9	13078.1
TIM3-2	12954	15575.6	14196.6	17848.8	17751.9	17346.1
KLK6	53695.3	56306.9	39048.3	51919.2	59044.4	62178.6
POSTN-1	16633.7	20073.4	18482.2	22122.2	19180	20407.3
POSTN-2	17851.7	22960	22904.5	21490.4	18949.8	23330.9
BCMA-1	80447.7	69899.6	54583.1	95928.4	116515	122770
BCMA-2	40189.3	52932.6	42285.1	70800.9	66129	66547.9
Figure 2d
Signature Peptide	Peak Area of 5% MeOH as 2nd Wash			Peak Area of 1% MeOH as 2nd Wash
	Rep 1	Rep 2	Rep 3	Rep 1	Rep 2	Rep 3
BCMA-2	97485.2	130132	93123.3	170330	207848	145936

## Sheet: Figure 3 Raw Data
Signature Peptide	Peak Area of Protein Digest in Buffer			Peak Area of Spiked Post-MCX
	Rep 1	Rep 2	Rep 3	Rep 1	Rep 2	Rep 3
CD28-1	17246.1	21953.5	25459.3	12350.3	15313	9843.62
CD28-2	23198.8	27970.5	28649.7	15829.4	17505.7	12580.4
PD-L1	42810.5	39704.7	39666.7	31722	26163.9	36543.4
TLR4-1	18621.9	21210.9	16323.6	11142.2	13917.6	15767.2
TLR4-2	44380.4	52752.6	43788	27522.2	27425.1	34410.7
TIM3-1	20094.6	12742	12482.5	15783.2	12684.9	13078.1
TIM3-2	12830.1	10772.2	10758.1	9315.94	8534.5	9879.94
KLK6	40523.1	26557.7	33589.3	26563.7	16824.3	30143.6
POSTN-1	11475.3	9707.75	9202.2	6873.35	4801.89	8200.36
POSTN-2	46130.3	39767.1	36917.7	33380.7	27560	38178.4
BCMA-1	232171	160654	162219	171068	146458	166020
BCMA-2	189968	134871	135757	149162	136044	151397

## Sheet: Figure 4 Raw Data
Figure 4c
POSTN-2	Peak Area (Spiked Pre-MCX 6hr)			Peak Area (Spiked Pre-Digestion 3hr)
	Rep 1	Rep 2	Rep 3	Rep 1	Rep 2	Rep 3
	1.44504e+06	1.32849e+06	1.2787e+06	1021062	991727	1.01301e+06
	Peak Area (Spiked Pre-Digestion 6hr)			Peak Area (Spiked Pre-Digestion Overnight)
	Rep 1	Rep 2	Rep 3	Rep 1	Rep 2	Rep 3
	550328	1.00052e+06	719021	952427	8761.42	59075.3
Figure 4d
Signature Peptide	Peak Area (After 3hr Digestion)			Peak Area (After Overnight Digestion)
	Rep 1	Rep 2	Rep 3	Rep 1	Rep 2	Rep 3
CD28-1	3855.94	3457.33	4959.74	44038.4	42773.1	43681.8
CD28-2	22608.5	13910.8	15676.7	21570.7	27712.5	25865.4
PD-L1	12725.3	16407.7	15954.3	53894.5	52139.8	51176.8
TLR4-1	24440.7	30726.6	32545.1	60853.1	53341.1	60207.2
TLR4-2	24456.5	29682.1	31716.3	132713	135208	93104.3
TIM3-1	4880.86	6829.88	6514.37	41626.5	47211.4	46224.1
TIM3-2	16081.1	19214	18633.3	10952	14889.9	10917.3
KLK6	54415	62189.5	47368.3	96387.9	82075.2	89196.3
POSTN-1	15509.7	15952.6	17139.8	6264.86	6216.02	6393.34
BCMA-1	56453.9	117799	106383	281387	173289	165439
BCMA-2	97485.2	130132	93123.3	97102.4	70344.7	80776.5

## Sheet: Figure 5&6 Table 2&3 Raw Data
PD-L1
File Name	Sample Type	STD Conc.	Analyte Peak Area	IS Peak Area
21September2018_serum_digest_R1_10	Standard	500	1717.55	215098
21September2018_serum_digest_R2_10	Standard	500	1363.93	172219
21September2018_serum_digest_R3_10	Standard	500	1261.5	161620
21September2018_serum_digest_R1_11	Standard	625	1586.78	192650
21September2018_serum_digest_R2_11	Standard	625	1819.64	266405
21September2018_serum_digest_R3_11	Standard	625	1478.68	210248
21September2018_serum_digest_R1_12	Standard	750	1966.34	314181
21September2018_serum_digest_R2_12	Standard	750	1592.09	227093
21September2018_serum_digest_R3_12	Standard	750	1970.68	230663
21September2018_serum_digest_R1_13	Standard	875	1638.78	213518
21September2018_serum_digest_R2_13	Standard	875	2607.98	275803
21September2018_serum_digest_R3_13	Standard	875	1905.12	219277
21September2018_serum_digest_R1_14	Standard	1000	2464.69	259616
21September2018_serum_digest_R2_14	Standard	1000	2879.73	194007
21September2018_serum_digest_R3_14	Standard	1000	2312.91	209916
21September2018_serum_digest_R1_15	Standard	2500	3102.06	323082
21September2018_serum_digest_R2_15	Standard	2500	2830.73	270730
21September2018_serum_digest_R3_15	Standard	2500	2847.85	270171
21September2018_serum_digest_R1_blank	Blank + IS		585.603	134775
21September2018_serum_digest_198_1	Analyte		461.99	465243
21September2018_serum_digest_198_2	Analyte		415.008	362585
21September2018_serum_digest_198_3	Analyte		398.388	352831
21September2018_serum_digest_196_1	Analyte		595.824	378757
21September2018_serum_digest_196_2	Analyte		680.553	398362
21September2018_serum_digest_196_3	Analyte		676.058	397139
21September2018_serum_digest_192_1	Analyte		694.022	269616
21September2018_serum_digest_192_2	Analyte		274.93	301957
21September2018_serum_digest_192_3	Analyte		644.69	349240
21September2018_serum_digest_191_1	Analyte		614.638	398997
21September2018_serum_digest_191_2	Analyte		603.309	451430
21September2018_serum_digest_191_3	Analyte		518.064	364498
21September2018_serum_digest_healthy_1	Analyte		398.144	164472
21September2018_serum_digest_healthy_2	Analyte		483.818	402430
21September2018_serum_digest_healthy_3	Analyte		696.973	243979
21September2018_serum_digest_R2_blank	Total Blank		338.678	619.474
21September2018_serum_digest_R3_blank	Total Blank		258.742	330.097
TLR4
File Name	Sample Type	STD Conc.	Analyte Peak Area	IS Peak Area
21September2018_serum_digest_R1_3	Standard	50	109.527	357191
21September2018_serum_digest_R2_3	Standard	50	54.484	226610
21September2018_serum_digest_R3_3	Standard	50	64.059	211770
21September2018_serum_digest_R1_4	Standard	75	60.222	142528
21September2018_serum_digest_R2_4	Standard	75	24.937	258434
21September2018_serum_digest_R3_4	Standard	75	115.704	166614
21September2018_serum_digest_R1_5	Standard	80	123.544	242333
21September2018_serum_digest_R2_5	Standard	80	81.385	236396
21September2018_serum_digest_R3_5	Standard	80		304128
21September2018_serum_digest_R1_6	Standard	100	98.58	223215
21September2018_serum_digest_R2_6	Standard	100	36.823	181112
21September2018_serum_digest_R3_6	Standard	100	69.852	310937
21September2018_serum_digest_R1_7	Standard	175	76.867	261864
21September2018_serum_digest_R2_7	Standard	175	205.177	294903
21September2018_serum_digest_R3_7	Standard	175	168.154	239408
21September2018_serum_digest_R1_8	Standard	250	565.066	262994
21September2018_serum_digest_R2_8	Standard	250	533.703	169612
21September2018_serum_digest_R3_8	Standard	250	382.333	279767
21September2018_serum_digest_R1_9	Standard	375	410.68	267392
21September2018_serum_digest_R2_9	Standard	375	461.629	294963
21September2018_serum_digest_R3_9	Standard	375	276.408	199392
21September2018_serum_digest_R1_10	Standard	500	913.14	217700
21September2018_serum_digest_R2_10	Standard	500	863.172	203668
21September2018_serum_digest_R3_10	Standard	500	795.647	283176
21September2018_serum_digest_R1_11	Standard	625	568.316	255734
21September2018_serum_digest_R2_11	Standard	625	1082.39	294122
21September2018_serum_digest_R3_11	Standard	625	1012.43	271562
21September2018_serum_digest_R1_12	Standard	750	1131.25	302809
21September2018_serum_digest_R2_12	Standard	750	953.714	220332
21September2018_serum_digest_R3_12	Standard	750	1145.02	291550
21September2018_serum_digest_R1_13	Standard	875	999.808	215048
21September2018_serum_digest_R2_13	Standard	875	1552.69	341024
21September2018_serum_digest_R3_13	Standard	875	1106.9	234803
21September2018_serum_digest_R1_14	Standard	1000	2009.24	285648
21September2018_serum_digest_R2_14	Standard	1000	1825.93	202944
21September2018_serum_digest_R3_14	Standard	1000	1405.11	252153
21September2018_serum_digest_R1_15	Standard	2500	3145.37	350236
21September2018_serum_digest_R2_15	Standard	2500	2519.45	288323
21September2018_serum_digest_R3_15	Standard	2500	1894.14	272192
21September2018_serum_digest_R1_blank	Blank + IS		9.654	175976
21September2018_serum_digest_198_1	Analyte		19.143	283016
21September2018_serum_digest_198_2	Analyte		27.576	227848
21September2018_serum_digest_198_3	Analyte		37.001	208269
21September2018_serum_digest_196_1	Analyte		33.603	228988
21September2018_serum_digest_196_2	Analyte		13.137	248673
21September2018_serum_digest_196_3	Analyte		13.489	265959
21September2018_serum_digest_192_1	Analyte		43.315	179411
21September2018_serum_digest_192_2	Analyte		56.157	193423
21September2018_serum_digest_192_3	Analyte		50.767	219694
21September2018_serum_digest_191_1	Analyte		37.356	209040
21September2018_serum_digest_191_2	Analyte		42.771	235419
21September2018_serum_digest_191_3	Analyte			176885
21September2018_serum_digest_healthy_1	Analyte		146.989	161106
21September2018_serum_digest_healthy_2	Analyte		107.739	366694
21September2018_serum_digest_healthy_3	Analyte		187.734	208002
21September2018_serum_digest_R2_blank	Total Blank		22.887	455.52
21September2018_serum_digest_R3_blank	Total Blank		4.652	78.777
TIM3
File Name	Sample Type	STD Conc.	Analyte Peak Area	IS Peak Area
21September2018_serum_digest_R1_6	Standard	100	62.63	35037.8
21September2018_serum_digest_R2_6	Standard	100	18.613	25095.2
21September2018_serum_digest_R3_6	Standard	100	22.584	35270.6
21September2018_serum_digest_R1_7	Standard	175	111.941	32788
21September2018_serum_digest_R2_7	Standard	175	72.24	33197.2
21September2018_serum_digest_R3_7	Standard	175	85.314	22945.1
21September2018_serum_digest_R1_8	Standard	250	219.219	34122.2
21September2018_serum_digest_R2_8	Standard	250	500.06	21313.9
21September2018_serum_digest_R3_8	Standard	250	243.906	32665.3
21September2018_serum_digest_R1_9	Standard	375	259.669	28761.1
21September2018_serum_digest_R2_9	Standard	375	373.269	34656.2
21September2018_serum_digest_R3_9	Standard	375	124.984	17334.7
21September2018_serum_digest_R1_10	Standard	500	547.835	25215.6
21September2018_serum_digest_R2_10	Standard	500	746.824	24880.8
21September2018_serum_digest_R3_10	Standard	500	299.639	29635.8
21September2018_serum_digest_R1_11	Standard	625	413.368	30786
21September2018_serum_digest_R2_11	Standard	625	894.277	34655.9
21September2018_serum_digest_R3_11	Standard	625	607.711	35077.5
21September2018_serum_digest_R1_12	Standard	750	731.359	36331.2
21September2018_serum_digest_R2_12	Standard	750	716.909	29755.6
21September2018_serum_digest_R3_12	Standard	750	847.217	35335
21September2018_serum_digest_R1_13	Standard	875	788.566	27777.5
21September2018_serum_digest_R2_13	Standard	875	979.573	33184
21September2018_serum_digest_R3_13	Standard	875	708.883	27103.9
21September2018_serum_digest_R1_14	Standard	1000	1254.81	37485.4
21September2018_serum_digest_R2_14	Standard	1000	1313.33	26188.8
21September2018_serum_digest_R3_14	Standard	1000	996.305	33146.3
21September2018_serum_digest_R1_15	Standard	2500	1983.5	30843
21September2018_serum_digest_R2_15	Standard	2500	1740.42	28454.8
21September2018_serum_digest_R3_15	Standard	2500	1491.11	25390
21September2018_serum_digest_R1_blank	Blank + IS		18.031	35038.5
21September2018_serum_digest_198_1	Analyte		55.481	55449.9
21September2018_serum_digest_198_2	Analyte		148.323	51082.5
21September2018_serum_digest_198_3	Analyte		18.817	53795.2
21September2018_serum_digest_196_1	Analyte		124.684	44936.9
21September2018_serum_digest_196_2	Analyte		86.648	50194.5
21September2018_serum_digest_196_3	Analyte		186.225	46428.7
21September2018_serum_digest_192_1	Analyte		147.812	36422.8
21September2018_serum_digest_192_2	Analyte		100.851	40893.5
21September2018_serum_digest_192_3	Analyte		110.318	44652.2
21September2018_serum_digest_191_1	Analyte		44.394	47725.2
21September2018_serum_digest_191_2	Analyte		93.846	49392
21September2018_serum_digest_191_3	Analyte		122.208	58971
21September2018_serum_digest_healthy_1	Analyte		31.77	29006.2
21September2018_serum_digest_healthy_2	Analyte		11.901	67999
21September2018_serum_digest_healthy_3	Analyte		51.686	44131.5
21September2018_serum_digest_R2_blank	Total Blank		10.62	526.639
21September2018_serum_digest_R3_blank	Total Blank		12.03	5.726
KLK-6
File Name	Sample Type	STD Conc.	Analyte Peak Area	IS Peak Area
21September2018_serum_digest_R1_6	Standard	100	245.71	359363
21September2018_serum_digest_R2_6	Standard	100	112.496	327266
21September2018_serum_digest_R3_6	Standard	100	113.678	509984
21September2018_serum_digest_R1_7	Standard	175	500.513	425354
21September2018_serum_digest_R2_7	Standard	175	546.183	462997
21September2018_serum_digest_R3_7	Standard	175	756.156	463667
21September2018_serum_digest_R1_8	Standard	250	1284.94	429278
21September2018_serum_digest_R2_8	Standard	250	1005.08	274222
21September2018_serum_digest_R3_8	Standard	250	980.793	465525
21September2018_serum_digest_R1_9	Standard	375	994.149	413142
21September2018_serum_digest_R2_9	Standard	375	1061.95	480460
21September2018_serum_digest_R3_9	Standard	375	732.424	359219
21September2018_serum_digest_R1_10	Standard	500	2164.19	364574
21September2018_serum_digest_R2_10	Standard	500	2771.71	321187
21September2018_serum_digest_R3_10	Standard	500	1893.58	511282
21September2018_serum_digest_R1_11	Standard	625	1803.6	387238
21September2018_serum_digest_R2_11	Standard	625	2839.28	512456
21September2018_serum_digest_R3_11	Standard	625	2673.45	468224
21September2018_serum_digest_R1_12	Standard	750	2673.11	496008
21September2018_serum_digest_R2_12	Standard	750	2476.41	356079
21September2018_serum_digest_R3_12	Standard	750	2939.52	457984
21September2018_serum_digest_R1_13	Standard	875	2743.71	335583
21September2018_serum_digest_R2_13	Standard	875	4177.52	534381
21September2018_serum_digest_R3_13	Standard	875	3031.85	393315
21September2018_serum_digest_R1_14	Standard	1000	3653.06	456973
21September2018_serum_digest_R2_14	Standard	1000	4439.92	346609
21September2018_serum_digest_R3_14	Standard	1000	3749.07	432986
21September2018_serum_digest_R1_15	Standard	2500	9323.86	545272
21September2018_serum_digest_R2_15	Standard	2500	8636.94	482787
21September2018_serum_digest_R3_15	Standard	2500	8101.93	498460
21September2018_serum_digest_R1_blank	Blank + IS		31.2	296978
21September2018_serum_digest_198_1	Analyte		798.295	446727
21September2018_serum_digest_198_2	Analyte		991.731	396579
21September2018_serum_digest_198_3	Analyte		955.331	399268
21September2018_serum_digest_196_1	Analyte		192.591	359755
21September2018_serum_digest_196_2	Analyte		668.632	419541
21September2018_serum_digest_196_3	Analyte			396361
21September2018_serum_digest_192_1	Analyte		988.637	307103
21September2018_serum_digest_192_2	Analyte		1975.44	339759
21September2018_serum_digest_192_3	Analyte		1782.34	378568
21September2018_serum_digest_191_1	Analyte		1775.16	361905
21September2018_serum_digest_191_2	Analyte		570.826	372453
21September2018_serum_digest_191_3	Analyte		2955.18	292923
21September2018_serum_digest_healthy_1	Analyte		157.592	253489
21September2018_serum_digest_healthy_2	Analyte		86.89	640625
21September2018_serum_digest_healthy_3	Analyte		231.947	364700
21September2018_serum_digest_R2_blank	Total Blank		65.79
21September2018_serum_digest_R3_blank	Total Blank
POSTN
File Name	Sample Type	STD Conc.	Analyte Peak Area	IS Peak Area
21September2018_serum_digest_R1_4	Standard	75	58.734	83688.1
21September2018_serum_digest_R2_4	Standard	75	58.745	153112
21September2018_serum_digest_R3_4	Standard	75	94.004	99320.6
21September2018_serum_digest_R1_5	Standard	80	193.511	155256
21September2018_serum_digest_R2_5	Standard	80	183.679	180875
21September2018_serum_digest_R3_5	Standard	80	186.485	184636
21September2018_serum_digest_R1_6	Standard	100	55.298	132048
21September2018_serum_digest_R2_6	Standard	100	75.571	108101
21September2018_serum_digest_R3_6	Standard	100	100.379	189612
21September2018_serum_digest_R1_7	Standard	175	193.439	127790
21September2018_serum_digest_R2_7	Standard	175	262	164848
21September2018_serum_digest_R3_7	Standard	175	205.486	108238
21September2018_serum_digest_R1_8	Standard	250	318.012	159970
21September2018_serum_digest_R2_8	Standard	250	373.175	99672.4
21September2018_serum_digest_R3_8	Standard	250	394.952	175792
21September2018_serum_digest_R1_9	Standard	375	362.968	139534
21September2018_serum_digest_R2_9	Standard	375	384.728	126632
21September2018_serum_digest_R3_9	Standard	375	354.245	113196
21September2018_serum_digest_R1_10	Standard	500	1163.32	128363
21September2018_serum_digest_R2_10	Standard	500	547.684	133196
21September2018_serum_digest_R3_10	Standard	500	690.347	169293
21September2018_serum_digest_R1_11	Standard	625	696.763	151962
21September2018_serum_digest_R2_11	Standard	625	1431.36	179193
21September2018_serum_digest_R3_11	Standard	625	1335.55	173144
21September2018_serum_digest_R1_12	Standard	750	1844.73	183852
21September2018_serum_digest_R2_12	Standard	750	1977.61	142339
21September2018_serum_digest_R3_12	Standard	750	1703.05	192344
21September2018_serum_digest_R1_13	Standard	875	1667.01	144553
21September2018_serum_digest_R2_13	Standard	875	1438.82	186705
21September2018_serum_digest_R3_13	Standard	875	1089.79	149477
21September2018_serum_digest_R1_14	Standard	1000	1665.43	190449
21September2018_serum_digest_R2_14	Standard	1000	2116.33	116417
21September2018_serum_digest_R3_14	Standard	1000	2656.3	173599
21September2018_serum_digest_R1_15	Standard	2500	2252.66	210219
21September2018_serum_digest_R2_15	Standard	2500	2031.17	136423
21September2018_serum_digest_R3_15	Standard	2500	1687.87	183928
21September2018_serum_digest_R1_blank	Blank + IS		26.194	88282.9
21September2018_serum_digest_198_1	Analyte		185.314	236371
21September2018_serum_digest_198_2	Analyte		312.649	203276
21September2018_serum_digest_198_3	Analyte		210.381	205752
21September2018_serum_digest_196_1	Analyte		918.536	210487
21September2018_serum_digest_196_2	Analyte		1009.27	236104
21September2018_serum_digest_196_3	Analyte		1478.24	257261
21September2018_serum_digest_192_1	Analyte		468.965	155163
21September2018_serum_digest_192_2	Analyte		321.938	163784
21September2018_serum_digest_192_3	Analyte		379.307	195458
21September2018_serum_digest_191_1	Analyte		487.084	182217
21September2018_serum_digest_191_2	Analyte		360.034	191081
21September2018_serum_digest_191_3	Analyte		351.081	126619
21September2018_serum_digest_healthy_1	Analyte		445.781	83111.2
21September2018_serum_digest_healthy_2	Analyte		395.215	207984
21September2018_serum_digest_healthy_3	Analyte		328.31	118899
21September2018_serum_digest_R2_blank	Total Blank		43.445	736.254
21September2018_serum_digest_R3_blank	Total Blank		20.369	212.776
BCMA
File Name	Sample Type	STD Conc.	Analyte Peak Area	IS Peak Area
21September2018_serum_digest_R1_2	Standard	25	46.616	4537.61
21September2018_serum_digest_R2_2	Standard	25	60.292	6730.02
21September2018_serum_digest_R3_2	Standard	25	84.032	8483.89
21September2018_serum_digest_R1_3	Standard	50	212.841	9164.22
21September2018_serum_digest_R2_3	Standard	50	104.398	7003.82
21September2018_serum_digest_R3_3	Standard	50	89.963	6142.66
21September2018_serum_digest_R1_4	Standard	75	108.522	3326.69
21September2018_serum_digest_R2_4	Standard	75	221.321	10084
21September2018_serum_digest_R3_4	Standard	75	221.577	8876.72
21September2018_serum_digest_R1_5	Standard	80	361.894	11895.8
21September2018_serum_digest_R2_5	Standard	80	220.781	9339.24
21September2018_serum_digest_R3_5	Standard	80	358.34	10142.3
21September2018_serum_digest_R1_6	Standard	100	197.531	6774.57
21September2018_serum_digest_R2_6	Standard	100	176.604	9940.35
21September2018_serum_digest_R3_6	Standard	100	142.177	12004.8
21September2018_serum_digest_R1_7	Standard	175	625.898	11374.1
21September2018_serum_digest_R2_7	Standard	175	549.452	10467.9
21September2018_serum_digest_R3_7	Standard	175	505.148	9091.05
21September2018_serum_digest_R1_8	Standard	250	2084.37	8476.73
21September2018_serum_digest_R2_8	Standard	250	1715.13	6408.55
21September2018_serum_digest_R3_8	Standard	250	1014.38	9258.01
21September2018_serum_digest_R1_9	Standard	375	2002.53	13121.2
21September2018_serum_digest_R2_9	Standard	375	1450.06	11214.5
21September2018_serum_digest_R3_9	Standard	375	687.055	8777.58
21September2018_serum_digest_R1_10	Standard	500	2062.79	5643.07
21September2018_serum_digest_R2_10	Standard	500	3175.06	7650.94
21September2018_serum_digest_R3_10	Standard	500	2071.23	10414.7
21September2018_serum_digest_R1_11	Standard	625	2181.73	9287.69
21September2018_serum_digest_R2_11	Standard	625	3449.88	12337.1
21September2018_serum_digest_R3_11	Standard	625	2497.13	9656.5
21September2018_serum_digest_R1_12	Standard	750	2632.93	10040.8
21September2018_serum_digest_R2_12	Standard	750	2810.11	8841.46
21September2018_serum_digest_R3_12	Standard	750	3853.67	10738.2
21September2018_serum_digest_R1_13	Standard	875	4388.1	8002.81
21September2018_serum_digest_R2_13	Standard	875	4387.08	11847.2
21September2018_serum_digest_R3_13	Standard	875	3066.43	7442.11
21September2018_serum_digest_R1_14	Standard	1000	3774.44	8035.87
21September2018_serum_digest_R2_14	Standard	1000	3326.75	7002.82
21September2018_serum_digest_R3_14	Standard	1000	3972.08	8569.49
21September2018_serum_digest_R1_15	Standard	2500	14239.2	10098.6
21September2018_serum_digest_R2_15	Standard	2500	11455.1	9267.69
21September2018_serum_digest_R3_15	Standard	2500	8826.69	8035.61
21September2018_serum_digest_R1_blank	Blank + IS		49.231	4839.11
21September2018_serum_digest_198_1	Analyte		198.848	12360.6
21September2018_serum_digest_198_2	Analyte		134.794	12326.5
21September2018_serum_digest_198_3	Analyte		116.928	12739.7
21September2018_serum_digest_196_1	Analyte		2169.15	9299.88
21September2018_serum_digest_196_2	Analyte		2466.57	9630.77
21September2018_serum_digest_196_3	Analyte		2103.19	9614.71
21September2018_serum_digest_192_1	Analyte		440.08	6440.62
21September2018_serum_digest_192_2	Analyte		370.549	6624.04
21September2018_serum_digest_192_3	Analyte		541.023	9084.41
21September2018_serum_digest_191_1	Analyte		1309.61	9031.49
21September2018_serum_digest_191_2	Analyte		1326.18	9166.64
21September2018_serum_digest_191_3	Analyte		1067.9	4920.16
21September2018_serum_digest_healthy_1	Analyte		113.026	2962.85
21September2018_serum_digest_healthy_2	Analyte		106.551	10321
21September2018_serum_digest_healthy_3	Analyte		127.499	6858.78
21September2018_serum_digest_R2_blank	Total Blank		48.798	86.177
21September2018_serum_digest_R3_blank	Total Blank		43.324	15.681
